# Supplementary material for: On the chemical interactions of the biomass processing agents γ-valerolactone (GVL) and N-methylmorpholine-N-oxide (NMMO)
Source: Royal Society of Chemistry journal article supplement (doi:10.1039/d1gc01777b), 2021-01-01
Supplement: d1gc01777b1.pdf [file d1gc01777b1.pdf]

Supplementary information for

## On the chemical interactions of the biomass processing agents $\gamma$ -valerolactone (GVL) and N-methylmorpholine-N-oxide (NMMO)

Paul Jusner<sup>a</sup>, Markus Bacher<sup>a</sup>, Hubert Hettegger<sup>a</sup>, Huy Quang Lê<sup>b</sup>, Antje Potthast<sup>a</sup>, Herbert Sixta<sup>b</sup>, Thomas Rosenau<sup>\*a</sup>

---

<sup>a</sup> *University of Natural Resources and Life Sciences Vienna (BOKU)  
Department of Chemistry, Institute of Chemistry of Renewable Resources  
Konrad Lorenz-Straße 24, 3430 Tulln an der Donau, Austria*

<sup>b</sup> *Aalto University  
Department of Bioproducts and Biosystems, School of Chemical Engineering  
Vuorimiehentie 1, 02150 Espoo, Finland*

\* Corresponding author, e-mail: thomas.rosenau@boku.ac.at

### Table of contents

#### 1. Values of Figures 1, 3, and 4

|                                 |       |
|---------------------------------|-------|
| Table 1: Values of Figure 1, A. | P. 2  |
| Table 2: Values of Figure 1, B. | P. 3  |
| Table 3: Values of Figure 1, C. | P. 4  |
| Table 4: Values of Figure 1, D. | P. 5  |
| Table 5: Values of Figure 3, A. | P. 6  |
| Table 6: Values of Figure 3, B. | P. 7  |
| Table 7: Values of Figure 3, C. | P. 8  |
| Table 8: Values of Figure 3, D. | P. 9  |
| Table 9: Values of Figure 4.    | P. 10 |

#### 2. Hazard classification NMMO P. 11

#### 3. Hazard classification NMMO-Monohydrate P.11

#### 4. Incidents with the NMMO and / or GVL systems P.12

## 1. Values of Figures 1, 3, and 4

**Table 1:** Values of Figure 1, A.

| <b>GVL loss (%), 100 °C [Figure 1, A]</b> |            |                                          |            |            |            |              |             |
|-------------------------------------------|------------|------------------------------------------|------------|------------|------------|--------------|-------------|
|                                           |            | <b>NMMO/H<sub>2</sub>O (molar ratio)</b> |            |            |            |              |             |
|                                           |            | <b>1:2</b>                               | <b>1:3</b> | <b>1:4</b> | <b>1:5</b> | <b>1:7.5</b> | <b>1:10</b> |
| <b>NMMO in GVL (wt%)</b>                  | <b>0.5</b> | 0                                        | 0          | 0          | 0          | 0            | 0           |
|                                           | <b>1</b>   | 0                                        | 0          | 0          | 0          | 0            | 0           |
|                                           | <b>1.5</b> | 0                                        | 0          | 0          | 0          | 0            | 0           |
|                                           | <b>2</b>   | 0                                        | 0          | 0          | 0          | 0            | 0           |
|                                           | <b>3</b>   | 0                                        | 0          | 0          | 0          | 0            | 0           |
|                                           | <b>4</b>   | 0                                        | 0          | 0          | 0          | 0            | 0           |
|                                           | <b>5</b>   | 0                                        | 0          | 0.1        | 0.1        | 0.3          | 0.3         |
|                                           | <b>7.5</b> | 0                                        | 0          | 0.2        | 0.5        | 0.5          | 0.6         |
|                                           | <b>10</b>  | 0                                        | 0          | 0.3        | 0.5        | 0.8          | 0.8         |

  

| <b>NMMO loss (%), 100 °C [Figure 1, A]</b> |            |                                          |            |            |            |              |             |
|--------------------------------------------|------------|------------------------------------------|------------|------------|------------|--------------|-------------|
|                                            |            | <b>NMMO/H<sub>2</sub>O (molar ratio)</b> |            |            |            |              |             |
|                                            |            | <b>1:2</b>                               | <b>1:3</b> | <b>1:4</b> | <b>1:5</b> | <b>1:7.5</b> | <b>1:10</b> |
| <b>NMMO in GVL (wt%)</b>                   | <b>0.5</b> | 0                                        | 0          | 0          | 0          | 0            | 0           |
|                                            | <b>1</b>   | 0                                        | 0          | 0          | 0          | 0            | 0           |
|                                            | <b>1.5</b> | 0                                        | 0          | 0          | 0          | 0            | 0           |
|                                            | <b>2</b>   | 0                                        | 0          | 0          | 0          | 0            | 0           |
|                                            | <b>3</b>   | 0                                        | 0          | 0          | 0          | 0            | 0           |
|                                            | <b>4</b>   | 0                                        | 0          | 0          | 0          | 0            | 0           |
|                                            | <b>5</b>   | 0                                        | 0          | 0          | 0          | 0            | 0           |
|                                            | <b>7.5</b> | 0                                        | 0          | 0          | 0          | 0            | 0           |
|                                            | <b>10</b>  | 0                                        | 0          | 0          | 0          | 0            | 0           |

**Table 2:** Values of Figure 1, B.

| <b>GVL loss (%), 125 °C [Figure 1, B]</b> |            |                                          |            |            |            |              |             |
|-------------------------------------------|------------|------------------------------------------|------------|------------|------------|--------------|-------------|
|                                           |            | <b>NMMO/H<sub>2</sub>O (molar ratio)</b> |            |            |            |              |             |
|                                           |            | <b>1:2</b>                               | <b>1:3</b> | <b>1:4</b> | <b>1:5</b> | <b>1:7.5</b> | <b>1:10</b> |
| <b>NMMO in GVL (wt%)</b>                  | <b>0.5</b> | 0                                        | 0          | 0          | 0          | 0.1          | 0.2         |
|                                           | <b>1</b>   | 0                                        | 0          | 0.1        | 0.2        | 0.3          | 0.3         |
|                                           | <b>1.5</b> | 0                                        | 0.1        | 0.2        | 0.2        | 0.4          | 0.6         |
|                                           | <b>2</b>   | 0                                        | 0.2        | 0.2        | 0.3        | 0.6          | 0.7         |
|                                           | <b>3</b>   | 0                                        | 0.3        | 0.4        | 0.5        | 0.8          | 0.8         |
|                                           | <b>4</b>   | 0.2                                      | 0.3        | 0.5        | 0.7        | 1            | 1.3         |
|                                           | <b>5</b>   | 0.2                                      | 0.4        | 0.7        | 0.9        | 1.3          | 1.6         |
|                                           | <b>7.5</b> | 0.4                                      | 0.6        | 0.9        | 1.3        | 1.7          | 2.6         |
|                                           | <b>10</b>  | 0.4                                      | 0.8        | 1.2        | 1.6        | 2.6          | 3.3         |

  

| <b>NMMO loss (%), 125 °C [Figure 1, B]</b> |            |                                          |            |            |            |              |             |
|--------------------------------------------|------------|------------------------------------------|------------|------------|------------|--------------|-------------|
|                                            |            | <b>NMMO/H<sub>2</sub>O (molar ratio)</b> |            |            |            |              |             |
|                                            |            | <b>1:2</b>                               | <b>1:3</b> | <b>1:4</b> | <b>1:5</b> | <b>1:7.5</b> | <b>1:10</b> |
| <b>NMMO in GVL (wt%)</b>                   | <b>0.5</b> | 2.5                                      | 8.6        | 1.8        | 0          | 0            | 0           |
|                                            | <b>1</b>   | 1.3                                      | 3.6        | 0.7        | 0          | 0            | 0           |
|                                            | <b>1.5</b> | 1.1                                      | 2          | 0.4        | 0          | 0            | 0           |
|                                            | <b>2</b>   | 0.6                                      | 1.7        | 0.4        | 0          | 0            | 0           |
|                                            | <b>3</b>   | 0.4                                      | 1.2        | 0.2        | 0          | 0            | 0           |
|                                            | <b>4</b>   | 0.2                                      | 0.9        | 0.2        | 0          | 0            | 0           |
|                                            | <b>5</b>   | 0.2                                      | 0.6        | 0.1        | 0          | 0            | 0           |
|                                            | <b>7.5</b> | 0.1                                      | 0.4        | 0.1        | 0          | 0            | 0           |
|                                            | <b>10</b>  | 0.1                                      | 0.3        | 0.1        | 0          | 0            | 0           |

**Table 3:** Values of Figure 1, C.

| <b>GVL loss (%), 150 °C [Figure 1, C]</b> |            |                                          |            |            |            |              |             |
|-------------------------------------------|------------|------------------------------------------|------------|------------|------------|--------------|-------------|
|                                           |            | <b>NMMO/H<sub>2</sub>O (molar ratio)</b> |            |            |            |              |             |
|                                           |            | <b>1:2</b>                               | <b>1:3</b> | <b>1:4</b> | <b>1:5</b> | <b>1:7.5</b> | <b>1:10</b> |
| <b>NMMO in GVL (wt%)</b>                  | <b>0.5</b> | 0.2                                      | 0.5        | 0          | 0          | 0.2          | 0.6         |
|                                           | <b>1</b>   | 0.2                                      | 0.5        | 0          | 0          | 0.5          | 1.1         |
|                                           | <b>1.5</b> | 0.1                                      | 0.5        | 0.4        | 0.5        | 1            | 1.7         |
|                                           | <b>2</b>   | 0.3                                      | 0.8        | 0.5        | 0.5        | 1.3          | 2.1         |
|                                           | <b>3</b>   | 0.1                                      | 1          | 0.7        | 0.8        | 1.9          | 2.5         |
|                                           | <b>4</b>   | 0.2                                      | 1.1        | 0.8        | 1.1        | 2.5          | 3.9         |
|                                           | <b>5</b>   | 0.2                                      | 1.1        | 0.8        | 1.2        | 3.1          | 4.4         |
|                                           | <b>7.5</b> | 0.2                                      | 1.4        | 1.2        | 1.9        | 4.4          | 6.9         |
|                                           | <b>10</b>  | 0.2                                      | 1.7        | 1.5        | 2.4        | 6            | 9.1         |

  

| <b>NMMO loss (%), 150 °C [Figure 1, C]</b> |            |                                          |            |            |            |              |             |
|--------------------------------------------|------------|------------------------------------------|------------|------------|------------|--------------|-------------|
|                                            |            | <b>NMMO/H<sub>2</sub>O (molar ratio)</b> |            |            |            |              |             |
|                                            |            | <b>1:2</b>                               | <b>1:3</b> | <b>1:4</b> | <b>1:5</b> | <b>1:7.5</b> | <b>1:10</b> |
| <b>NMMO in GVL (wt%)</b>                   | <b>0.5</b> | 23.5                                     | 86.4       | 18.4       | 0          | 0            | 0           |
|                                            | <b>1</b>   | 12.8                                     | 36.4       | 7.2        | 0          | 0            | 0           |
|                                            | <b>1.5</b> | 11.1                                     | 35.1       | 4.5        | 0          | 0            | 0           |
|                                            | <b>2</b>   | 10.5                                     | 33.4       | 4.4        | 0          | 0            | 0           |
|                                            | <b>3</b>   | 10.5                                     | 28         | 3.9        | 0          | 0            | 0           |
|                                            | <b>4</b>   | 9                                        | 23         | 2.5        | 0          | 0            | 0           |
|                                            | <b>5</b>   | 7.2                                      | 16         | 1.8        | 0          | 0            | 0           |
|                                            | <b>7.5</b> | 3.7                                      | 9.8        | 0.9        | 0          | 0            | 0           |
|                                            | <b>10</b>  | 1.4                                      | 3.2        | 0.7        | 0          | 0            | 0           |

**Table 4:** Values of Figure 1, D.

| <b>GVL loss (%), 180 °C [Figure 1, D]</b> |            |                                          |            |            |            |              |             |
|-------------------------------------------|------------|------------------------------------------|------------|------------|------------|--------------|-------------|
|                                           |            | <b>NMMO/H<sub>2</sub>O (molar ratio)</b> |            |            |            |              |             |
|                                           |            | <b>1:2</b>                               | <b>1:3</b> | <b>1:4</b> | <b>1:5</b> | <b>1:7.5</b> | <b>1:10</b> |
| <b>NMMO in GVL (wt%)</b>                  | <b>0.5</b> | 1                                        | 3.9        | 0          | 0          | 0.9          | 1.2         |
|                                           | <b>1</b>   | 1.2                                      | 8.6        | 0.5        | 0.8        | 1.9          | 2.4         |
|                                           | <b>1.5</b> | 1.4                                      | 9          | 0.9        | 1.6        | 2.6          | 3.4         |
|                                           | <b>2</b>   | 1.7                                      | 9.5        | 1.2        | 2.2        | 3.5          | 4           |
|                                           | <b>3</b>   | 2.3                                      | 10.3       | 2          | 3.1        | 4.6          | 5.3         |
|                                           | <b>4</b>   | 2.6                                      | 11.2       | 2.8        | 4          | 6.4          | 7.6         |
|                                           | <b>5</b>   | 3.4                                      | 12.4       | 3.6        | 5.2        | 7.4          | 9.5         |
|                                           | <b>7.5</b> | 4.8                                      | 14.9       | 4.9        | 8.2        | 13.3         | 15.1        |
|                                           | <b>10</b>  | 6.9                                      | 17.3       | 6.2        | 11.6       | 17.4         | 19.2        |

  

| <b>NMMO loss (%), 180 °C [Figure 1, D]</b> |            |                                          |            |            |            |              |             |
|--------------------------------------------|------------|------------------------------------------|------------|------------|------------|--------------|-------------|
|                                            |            | <b>NMMO/H<sub>2</sub>O (molar ratio)</b> |            |            |            |              |             |
|                                            |            | <b>1:2</b>                               | <b>1:3</b> | <b>1:4</b> | <b>1:5</b> | <b>1:7.5</b> | <b>1:10</b> |
| <b>NMMO in GVL (wt%)</b>                   | <b>0.5</b> | 34                                       | 100        | 100        | 23         | 0            | 0           |
|                                            | <b>1</b>   | 16                                       | 100        | 92         | 4          | 0            | 0           |
|                                            | <b>1.5</b> | 13.4                                     | 100        | 76         | 0          | 0            | 0           |
|                                            | <b>2</b>   | 8.3                                      | 96         | 51         | 0          | 0            | 0           |
|                                            | <b>3</b>   | 5.2                                      | 67         | 36         | 0          | 0            | 0           |
|                                            | <b>4</b>   | 4.1                                      | 53         | 23         | 0          | 0            | 0           |
|                                            | <b>5</b>   | 3                                        | 41         | 16         | 0          | 0            | 0           |
|                                            | <b>7.5</b> | 2.1                                      | 26         | 16         | 0          | 0            | 0           |
|                                            | <b>10</b>  | 2.1                                      | 23         | 9          | 0          | 0            | 0           |

**Table 5:** Values of Figure 3, A.

| <b>GVL loss (%), 100 °C [Figure 3, A]</b>         |              |                          |           |           |          |
|---------------------------------------------------|--------------|--------------------------|-----------|-----------|----------|
|                                                   |              | <b>NMMO charge (wt%)</b> |           |           |          |
|                                                   |              | <b>20</b>                | <b>15</b> | <b>10</b> | <b>5</b> |
| <b>GVL/H<sub>2</sub>O</b><br><b>(molar ratio)</b> | <b>50:50</b> | 3.8                      | 3.4       | 2         | 1.8      |
|                                                   | <b>60:40</b> | 5.6                      | 4.1       | 2.9       | 2.6      |
|                                                   | <b>70:30</b> | 7.2                      | 5.9       | 4.1       | 3        |
|                                                   | <b>80:20</b> | 8.2                      | 8.1       | 7.9       | 4.2      |
|                                                   | <b>90:10</b> | 8.1                      | 7.9       | 9.8       | 6.4      |
|                                                   | <b>100:0</b> | 12.2                     | 10.2      | 11.3      | 5.8      |

  

| <b>NMMO loss (%), 100 °C [Figure 3, A]</b>        |              |                          |           |           |          |
|---------------------------------------------------|--------------|--------------------------|-----------|-----------|----------|
|                                                   |              | <b>NMMO charge (wt%)</b> |           |           |          |
|                                                   |              | <b>20</b>                | <b>15</b> | <b>10</b> | <b>5</b> |
| <b>GVL/H<sub>2</sub>O</b><br><b>(molar ratio)</b> | <b>50:50</b> | 18                       | 26        | 38        | 74       |
|                                                   | <b>60:40</b> | 24                       | 35        | 49        | 80       |
|                                                   | <b>70:30</b> | 31                       | 44        | 62        | 93       |
|                                                   | <b>80:20</b> | 40                       | 54        | 73        | 98       |
|                                                   | <b>90:10</b> | 46                       | 63        | 85        | 100      |
|                                                   | <b>100:0</b> | 48                       | 74        | 98        | 100      |

**Table 6:** Values of Figure 3, B.

| <b>GVL loss (%), 125 °C [Figure 3, B]</b>         |              |                          |           |           |          |
|---------------------------------------------------|--------------|--------------------------|-----------|-----------|----------|
|                                                   |              | <b>NMMO charge (wt%)</b> |           |           |          |
|                                                   |              | <b>20</b>                | <b>15</b> | <b>10</b> | <b>5</b> |
| <b>GVL/H<sub>2</sub>O</b><br><b>(molar ratio)</b> | <b>50:50</b> | 8.9                      | 9.4       | 6.5       | 3.3      |
|                                                   | <b>60:40</b> | 10.1                     | 8.8       | 7.9       | 5.4      |
|                                                   | <b>70:30</b> | 12.1                     | 9.9       | 8.5       | 6.8      |
|                                                   | <b>80:20</b> | 13.9                     | 11        | 10.2      | 7.2      |
|                                                   | <b>90:10</b> | 15                       | 13.6      | 12.2      | 7.4      |
|                                                   | <b>100:0</b> |                          |           |           |          |
| <b>NMMO loss (%), 125 °C [Figure 3, B]</b>        |              |                          |           |           |          |
|                                                   |              | <b>NMMO charge (wt%)</b> |           |           |          |
|                                                   |              | <b>20</b>                | <b>15</b> | <b>10</b> | <b>5</b> |
| <b>GVL/H<sub>2</sub>O</b><br><b>(molar ratio)</b> | <b>50:50</b> | 24                       | 31        | 48        | 84       |
|                                                   | <b>60:40</b> | 36                       | 44        | 58        | 98       |
|                                                   | <b>70:30</b> | 48                       | 59        | 72        | 100      |
|                                                   | <b>80:20</b> | 50                       | 74        | 86        | 100      |
|                                                   | <b>90:10</b> | 54                       | 90        | 94        | 100      |
|                                                   | <b>100:0</b> |                          |           |           |          |

**Table 7:** Values of Figure 3, C.

| <b>GVL loss (%), 150 °C [Figure 3, C]</b>   |              |                          |           |           |          |
|---------------------------------------------|--------------|--------------------------|-----------|-----------|----------|
|                                             |              | <b>NMMO charge (wt%)</b> |           |           |          |
|                                             |              | <b>20</b>                | <b>15</b> | <b>10</b> | <b>5</b> |
| <b>GVL/H<sub>2</sub>O<br/>(molar ratio)</b> | <b>50:50</b> | 29.9                     | 21.3      | 15.8      | 11.1     |
|                                             | <b>60:40</b> | 31.4                     | 22        | 16.6      | 12.3     |
|                                             | <b>70:30</b> | 31                       | 22.3      | 16.9      | 11.4     |
|                                             | <b>80:20</b> | 31.8                     | 24.8      | 17.4      | 11.6     |
|                                             | <b>90:10</b> |                          |           |           |          |
|                                             | <b>100:0</b> |                          |           |           |          |
| <b>NMMO loss (%), 150 °C [Figure 3, C]</b>  |              |                          |           |           |          |
|                                             |              | <b>NMMO charge (wt%)</b> |           |           |          |
|                                             |              | <b>20</b>                | <b>15</b> | <b>10</b> | <b>5</b> |
| <b>GVL/H<sub>2</sub>O<br/>(molar ratio)</b> | <b>50:50</b> | 64                       | 72        | 100       | 100      |
|                                             | <b>60:40</b> | 72                       | 84        | 100       | 100      |
|                                             | <b>70:30</b> | 85                       | 94        | 100       | 100      |
|                                             | <b>80:20</b> | 92                       | 100       | 100       | 100      |
|                                             | <b>90:10</b> |                          |           |           |          |
|                                             | <b>100:0</b> |                          |           |           |          |



**Table 8:** Values of Figure 3, D.

| <b>GVL loss (%), 180 °C [Figure 3, D]</b>   |              |                          |           |           |          |
|---------------------------------------------|--------------|--------------------------|-----------|-----------|----------|
|                                             |              | <b>NMMO charge (wt%)</b> |           |           |          |
|                                             |              | <b>20</b>                | <b>15</b> | <b>10</b> | <b>5</b> |
| <b>GVL/H<sub>2</sub>O<br/>(molar ratio)</b> | <b>50:50</b> | 34.4                     | 29        | 18.4      | 8.6      |
|                                             | <b>60:40</b> | 35.6                     | 29.4      | 19.2      | 9.4      |
|                                             | <b>70:30</b> |                          |           |           |          |
|                                             | <b>80:20</b> |                          |           |           |          |
|                                             | <b>90:10</b> |                          |           |           |          |
|                                             | <b>100:0</b> |                          |           |           |          |
| <b>NMMO loss (%), 180 °C [Figure 3, D]</b>  |              |                          |           |           |          |
|                                             |              | <b>NMMO charge (wt%)</b> |           |           |          |
|                                             |              | <b>20</b>                | <b>15</b> | <b>10</b> | <b>5</b> |
| <b>GVL/H<sub>2</sub>O<br/>(molar ratio)</b> | <b>50:50</b> | 100                      | 100       | 100       | 100      |
|                                             | <b>60:40</b> | 100                      | 100       | 100       | 100      |
|                                             | <b>70:30</b> |                          |           |           |          |
|                                             | <b>80:20</b> |                          |           |           |          |
|                                             | <b>90:10</b> |                          |           |           |          |
|                                             | <b>100:0</b> |                          |           |           |          |

**Table 9:** Values of Figure 4.

| <b>GVL:H<sub>2</sub>O 60:40, 150 °C [Figure 4, A]</b> |                     |                      |
|-------------------------------------------------------|---------------------|----------------------|
|                                                       | <b>GVL loss (%)</b> | <b>NMMO loss (%)</b> |
| <b>Biomass</b>                                        | 16.6                | 100                  |
| <b>Cellulose</b>                                      | 1.4                 | 10.4                 |
| <b>Lignin</b>                                         | 55.7                | 100                  |
| <b>Xylan</b>                                          | 4.3                 | 4.5                  |
| <b>Model mix</b>                                      | 12.9                | 100                  |

| <b>GVL:H<sub>2</sub>O 80:20, 150 °C [Figure 4, B]</b> |                     |                      |
|-------------------------------------------------------|---------------------|----------------------|
|                                                       | <b>GVL loss (%)</b> | <b>NMMO loss (%)</b> |
| <b>Biomass</b>                                        | 17.4                | 100                  |
| <b>Cellulose</b>                                      | 0.9                 | 16.8                 |
| <b>Lignin</b>                                         | 62.9                | 100                  |
| <b>Xylan</b>                                          | 7.1                 | 32.4                 |
| <b>Model mix</b>                                      | 19.3                | 98.4                 |

| <b>GVL:H<sub>2</sub>O 60:40, 180 °C [Figure 4, C]</b> |                     |                      |
|-------------------------------------------------------|---------------------|----------------------|
|                                                       | <b>GVL loss (%)</b> | <b>NMMO loss (%)</b> |
| <b>Biomass</b>                                        | 19.2                | 100                  |
| <b>Cellulose</b>                                      | 3                   | 18.3                 |
| <b>Lignin</b>                                         | 77.2                | 100                  |
| <b>Xylan</b>                                          | 6.1                 | 38.6                 |
| <b>Model mix</b>                                      | 22.4                | 100                  |

| <b>GVL:H<sub>2</sub>O 80:20, 180 °C [Figure 4, D]</b> |                     |                      |
|-------------------------------------------------------|---------------------|----------------------|
|                                                       | <b>GVL loss (%)</b> | <b>NMMO loss (%)</b> |
| <b>Biomass</b>                                        |                     |                      |
| <b>Cellulose</b>                                      | 2.8                 | 25.4                 |
| <b>Lignin</b>                                         |                     |                      |
| <b>Xylan</b>                                          | 10.5                | 50.4                 |
| <b>Model mix</b>                                      |                     |                      |

## 2. Hazard classification NMMO<sup>1</sup>

Classification and labelling according to (EC) No 1272/2008

### Hazard statements

|      |                                                                                                       |
|------|-------------------------------------------------------------------------------------------------------|
| H315 | Causes skin irritation (category 2).                                                                  |
| H319 | Causes serious eye irritation (category 2).                                                           |
| H335 | Specific target organ toxicity - (single exposure) (category 3).<br>May cause respiratory irritation. |

### Precautionary statements

|                    |                                                                                                                                     |
|--------------------|-------------------------------------------------------------------------------------------------------------------------------------|
| P261               | Avoid breathing dust.                                                                                                               |
| P305 + P351 + P338 | IF IN EYES: Rinse cautiously with water for several minutes.<br>Remove contact lenses, if present and easy to do. Continue rinsing. |

### Pictogram

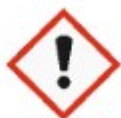

Warning

## 3. Hazard classification NMMO-Monohydrate<sup>2</sup>

Classification and labelling according to (EC) No 1272/2008

### Hazard statements

|      |                                                                                                       |
|------|-------------------------------------------------------------------------------------------------------|
| H315 | Causes skin irritation (category 2).                                                                  |
| H319 | Causes serious eye irritation (category 2).                                                           |
| H335 | Specific target organ toxicity - (single exposure) (category 3).<br>May cause respiratory irritation. |

---

<sup>1</sup> <https://www.sigmaaldrich.com/MSDS/MSDS/DisplayMSDSPage.do?country=AT&language=EN-generic&productNumber=224286&brand=ALDRICH&PageToGoToURL=https%3A%2F%2Fwww.sigmaaldrich.com%2Fcatalog%2Fproduct%2Faldrich%2F224286%3Flang%3Dde>, 12.5.2021

<sup>2</sup> <https://www.alfa.com/de/msds/?language=EE&subformat=CLP1&sku=A15996>, 12.5.2021

## Precautionary statements

|             |                                                                                                  |
|-------------|--------------------------------------------------------------------------------------------------|
| P302 + P352 | IF ON SKIN: Wash with plenty of soap and water.                                                  |
| P337 + P313 | If eye irritation persists: Get medical advice/attention.                                        |
| P304 + P340 | IF INHALED: Remove victim to fresh air and keep at rest in a position comfortable for breathing. |
| P312        | Call a POISON CENTER or doctor/physician if you feel unwell.                                     |
| P280        | Wear protective gloves/protective clothing/eye protection/face protection.                       |
| P332 + P313 | If skin irritation occurs: Get medical advice/attention.                                         |

## Pictogram

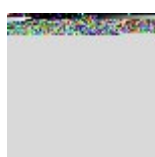

Warning

## 4. Known incidents in the past five years, involving NMMO and/or GVL systems

| Year, region, institution (anonymized)      | Biomass processing system used                                             | Description of the incident                                                                                                                                               |
|---------------------------------------------|----------------------------------------------------------------------------|---------------------------------------------------------------------------------------------------------------------------------------------------------------------------|
| 2020, South Asia, company A                 | NMMO pretreatment of bamboo biomass, followed by GVL pulping               | Uncontrolled exothermicity during pulping at 180°C, charring. Situation improved by washing after the NMMO step.                                                          |
| 2020, Middle America, company B             | NMMO preactivation of maize stalks, followed by GVL pulping                | Black discoloration and temperature rise during pulping at 160 – 180°C. Washing after NMMO step lowered NMMO content to <1% (rel. to GVL) and overcame the color problem. |
| 2019, South America, research institution I | Simultaneous acidic hydrolysis and NMMO preactivation                      | Strong exothermicity at already 85 °C due to Polonowski-type degradation of NMMO.                                                                                         |
| 2019, South Asia, company A                 | NMMO pretreatment of palm oil empty fruit bunches, followed by GVL pulping | Uncontrolled exothermicity upon distillation/purification of GVL due to accumulated NMMO from carryovers.                                                                 |
| 2019, South Asia,                           | Three-step sequence of GVL                                                 | Strong discoloration in step 3 at                                                                                                                                         |

|                                             |                                                                                             |                                                                                                                                                             |
|---------------------------------------------|---------------------------------------------------------------------------------------------|-------------------------------------------------------------------------------------------------------------------------------------------------------------|
| research institution II                     | – aqueous NMMO – GVL treatment for delignification and saccharification of palm oil biomass | 185 °C, disappeared with a better washing after step 2 and lowering the temperature to 170°C.                                                               |
| 2019, Africa, research institution III      | NMMO preactivation of rice straw, followed by ionic liquid pretreatment and GVL pulping     | Instabilities (exothermicities, complete charring) in GVL step above 150 °C. Thorough washing and elimination if the ionic liquid step removed the problem. |
| 2018, Europe, research institution IV       | Attempted esterification of NMMO-pretreated woody biomass                                   | Vigorous exothermicity and breaking of reaction vessel (90 °C), due to instability of NMMO towards acylating agents.                                        |
| 2018, South Asia, research institution II   | Dissolution of GVL-pulped bamboo in NMMO-mono hydrate for fiber spinning (Lyocell)          | Charring and black discoloration of spinning dope (105 °C, 10% pulp), disappeared when pulp was thoroughly washed free of GVL before.                       |
| 2016 South Asia, company C                  | NMMO preactivation of biomass, followed by GVL pulping                                      | Uncontrolled exothermicity during pulping at 175 -180 °C with charring. Situation improved by washing after the NMMO step.                                  |
| 2016 Europe, research institution V         | Dissolution of hardwood dissolving pulp in NMMO for fiber spinning (Lyocell)                | Charring and black discoloration of spinning dope (120 °C), disappeared when pH was kept above neutral and complexation agents were added.                  |
| 2016 South America, research institution VI | GVL delignification of eucalyptus followed by dissolution in NMMO                           | Charring and black discoloration of spinning dope (temp. not known), system was stable when pulp was thoroughly washed free of GVL before.                  |
